# Supplementary material for: Targeting a moonlighting function of aldolase induces apoptosis in cancer cells
Source: PubMed Central journal article supplement (PMC6763475; doi:10.1038/s41419-019-1968-4), 2019-09-26
Supplement: 41419_2019_1968_MOESM1_ESM.pdf [file 41419_2019_1968_MOESM1_ESM.pdf]

a)

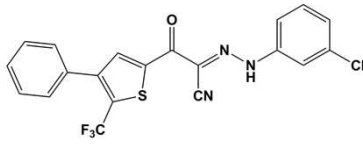

(E)-N'-(3-chlorophenyl)-2-oxo-2-(4-phenyl-5-(trifluoromethyl)thiophen-2-yl)acetohydrazonyl cyanide  
 Chemical Formula: C<sub>20</sub>H<sub>11</sub>ClF<sub>3</sub>N<sub>3</sub>O  
 Molecular Weight: 433.83  
 avg LogP 6.58 (1.35)  
 avg LogS -6.48 (-0.2mg/L)

ClC1=CC(N=N=C(C#N)C(C2=CC(C3=CC=CC=C3)-C(C(F)(F)F)S2)=O)=CC=C1

b)

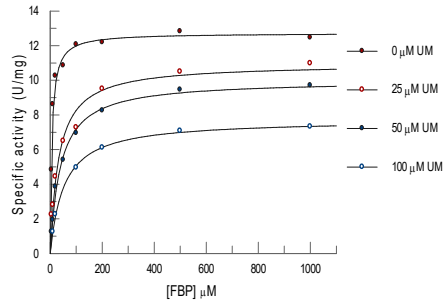

$$v = \frac{V_{max} \cdot [S]}{K_m \left(1 + \frac{[I]}{K_i}\right) + \left(1 + \frac{[I]}{K_i'}\right) [S]}$$

Equation: Mixed Inhibition  
 Weighting: Simple  
 Data points: 30  
 Chi<sup>2</sup>: 3.4919  
 Reduced Chi<sup>2</sup>: 0.1343

| Parameter | Value    | Std. Error |
|-----------|----------|------------|
| Vmax      | 12.6740  | 0.1813     |
| Km        | 6.0021   | 0.6127     |
| Ki        | 6.2195   | 0.8114     |
| Ki' value | 175.0644 | 17.0535    |

c)

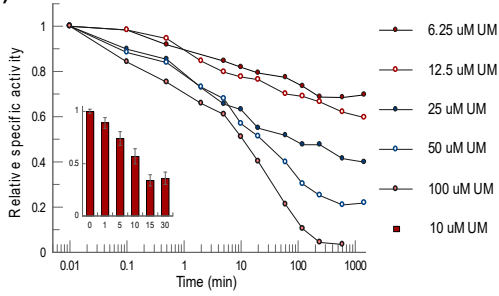

d)

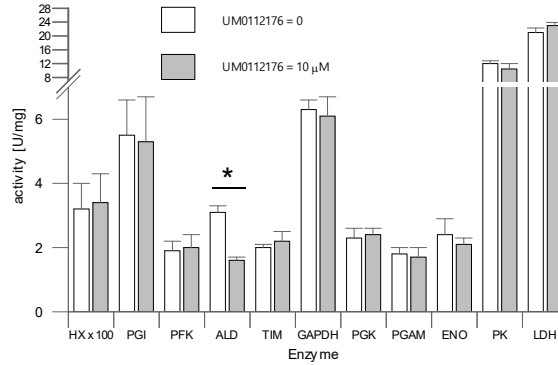

e)

|                       | FBP   |     | P-TRIOSES |     |
|-----------------------|-------|-----|-----------|-----|
|                       | μM    | SD  | μM        | SD  |
| <b>KLN205</b>         |       |     |           |     |
| Full medium           | 60*   | 22  | 153*      | 46  |
| Full medium+UM0112176 | 199   | 38  | 78        | 20  |
| glutamine only        | 50*   | 11  | 99*       | 28  |
| glutamine+UM0112176   | 34    | 10  | 223       | 29  |
| glucose only          | 64*   | 23  | 100*      | 11  |
| glucose+UM0112176     | 137   | 25  | 89        | 10  |
| <b>ASTROCYTES</b>     |       |     |           |     |
| Full medium           | 617** | 91  | 933*      | 224 |
| Full medium+UM0112176 | 1155  | 109 | 279       | 62  |
| glutamine only        | 292*  | 49  | 1038*     | 99  |
| glutamine+UM0112176   | 250   | 46  | 3158      | 566 |
| glucose only          | 476*  | 61  | 565*      | 113 |
| glucose+UM0112176     | 847   | 140 | 347       | 97  |

n=3 (three independent cells culturing experiments)

\* - p<0.05

\*\* - p<0.005

1 - full medium (glucose – 5 mM, glutamine- 2 mM)

2 - full medium+UM0112176

3 – glutamine (2 mM) only

4 – glutamine only+UM0112176

5 – glucose (5 mM) only

6 – glucose only + UM0112176
