# Supplementary material for: Targeting a moonlighting function of aldolase induces apoptosis in cancer cells
Source: PubMed Central journal article supplement (PMC6763475; doi:10.1038/s41419-019-1968-4), 2019-09-26

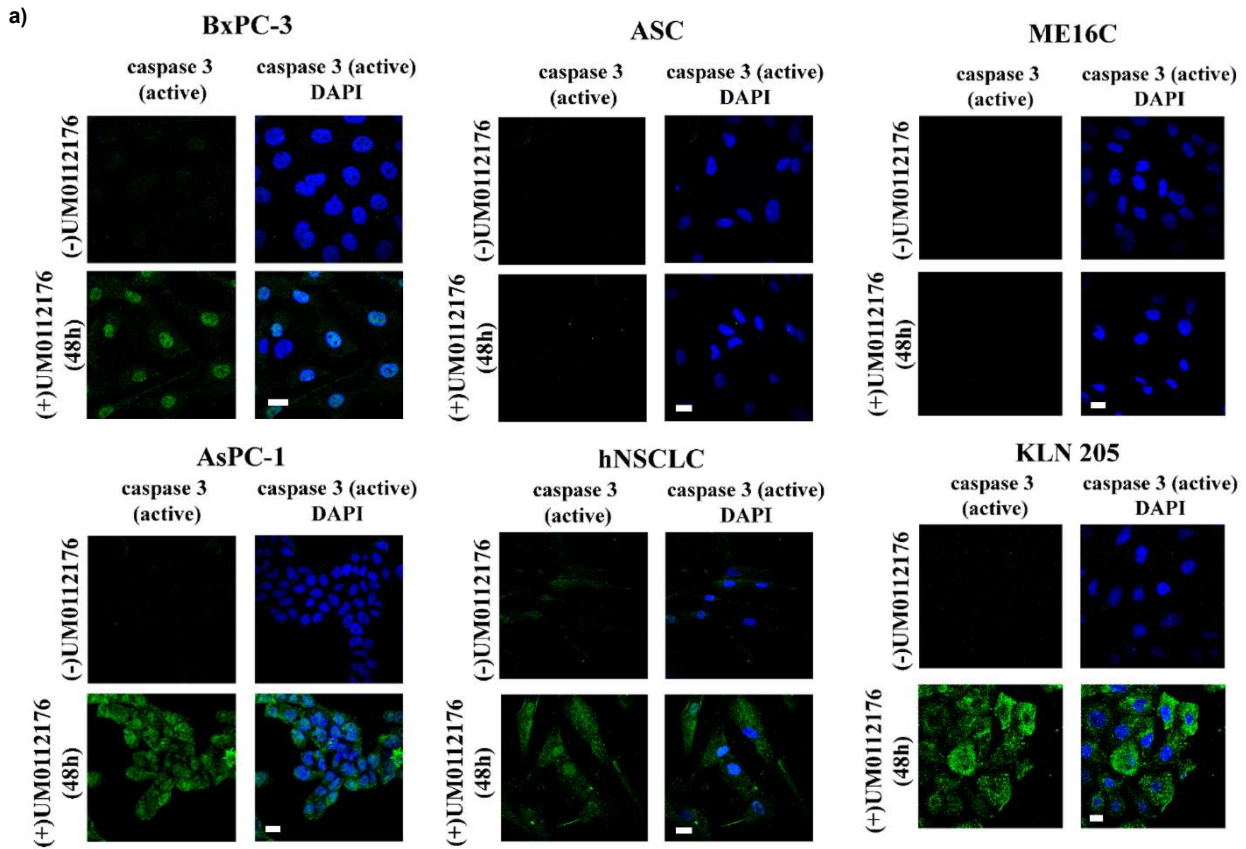

BxPC-3 - human primary pancreatic adenocarcinoma; ASC – primary culture of rat astrocytes; Me16C - epithelial cells immortalized with hTERT; AsPC-1 – from human pancreas adenocarcinoma ascites metastasis; KLN205 – mouse lung squamous cell carcinoma; hNSCLC – human small cell lung squamous cancer

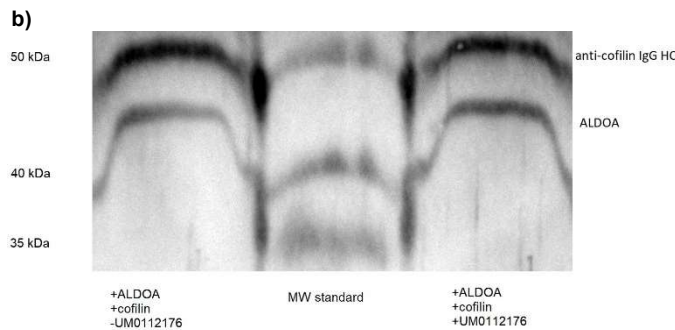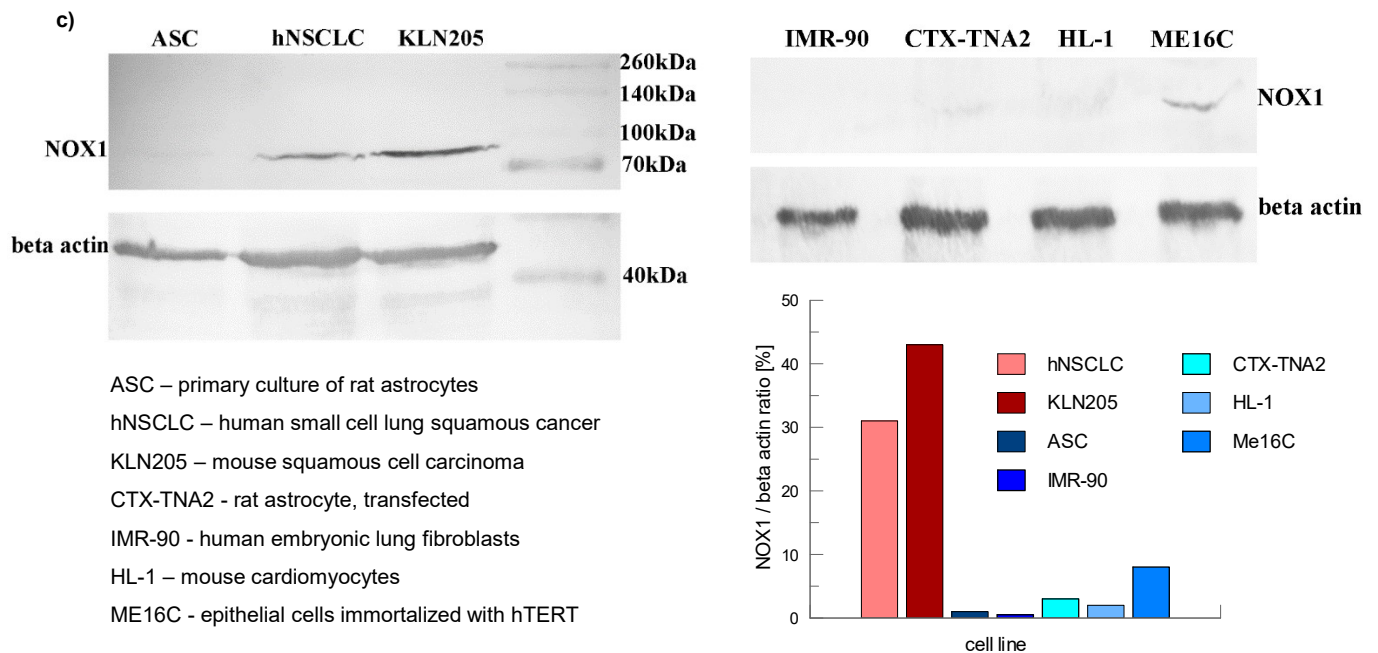

Supplement: 41419_2019_1968_MOESM2_ESM.pdf [file 41419_2019_1968_MOESM2_ESM.pdf]
