# Supplementary material for: Targeting a moonlighting function of aldolase induces apoptosis in cancer cells
Source: PubMed Central journal article supplement (PMC6763475; doi:10.1038/s41419-019-1968-4), 2019-09-26

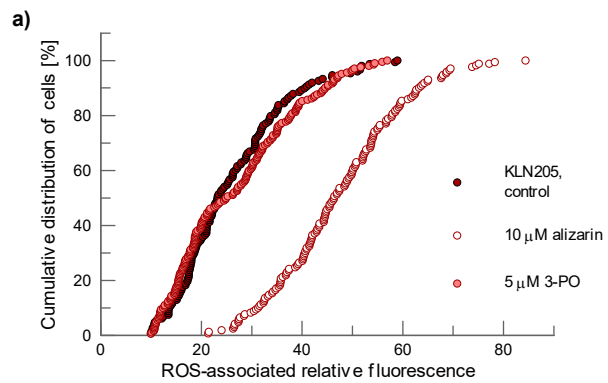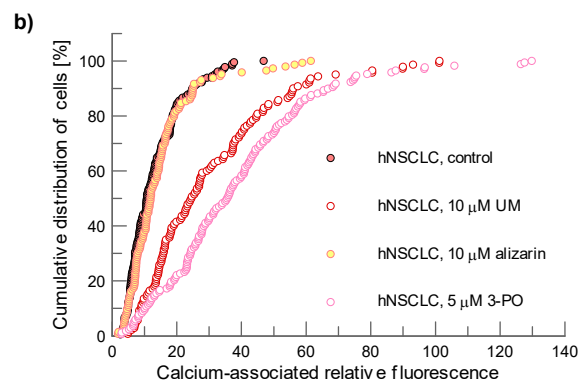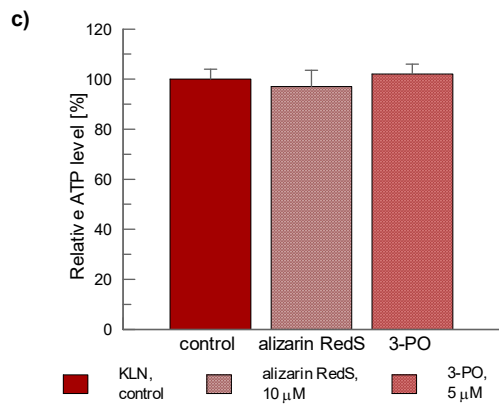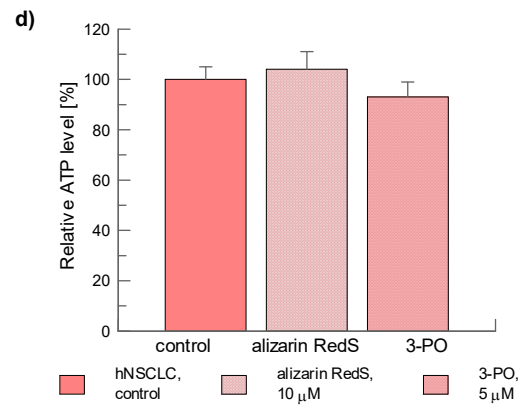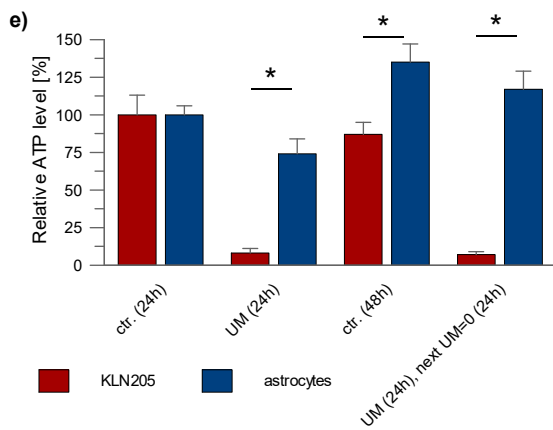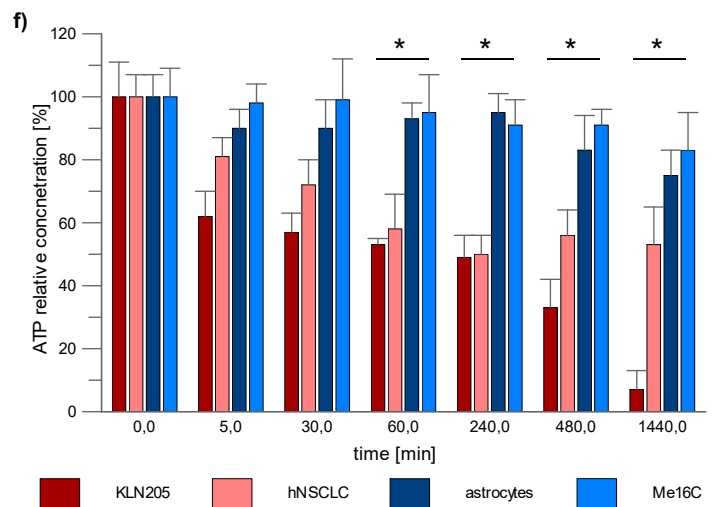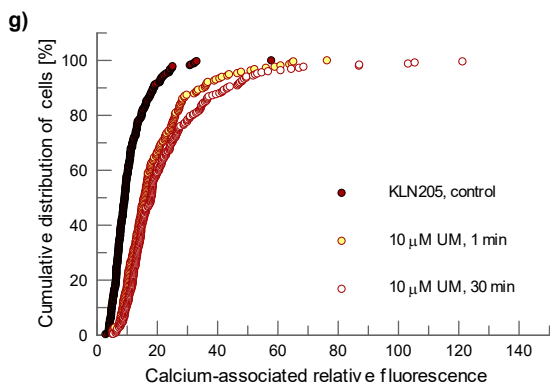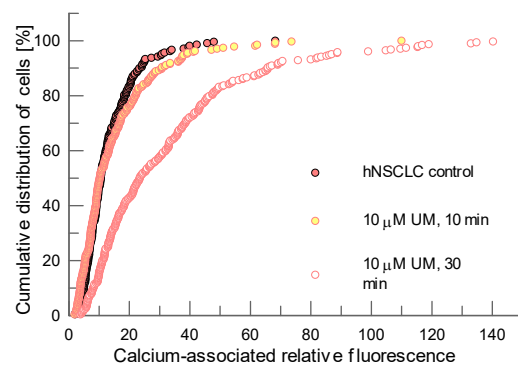

Supplement: 41419_2019_1968_MOESM4_ESM.pdf [file 41419_2019_1968_MOESM4_ESM.pdf]
